# Supplementary material for: Digital NHS Wales: a coding reliability analysis based on the voices of 22 978 patients and clinicians on the benefits, challenges and sustainability of video consulting
Source: HighWire-hosted journal article supplement (doi:10.1136/bmjopen-2021-057874), 2022-04-01
Supplement: bmjopen-2021-057874supp011_data_supplement.pdf [file bmjopen-2021-057874supp011_data_supplement.pdf]

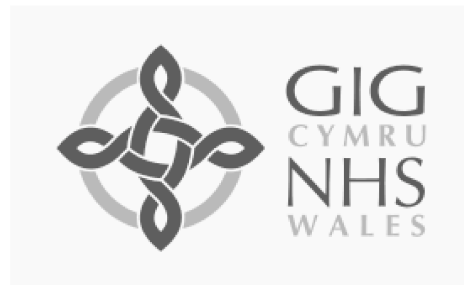

## Video Consulting Patient Copy

### Survey 1:

1. Please rate the quality of your video consultation Rhowch sgôr i ansawdd eich galwad fideo

|            |           |         |                   |                      |
|------------|-----------|---------|-------------------|----------------------|
| Poor Gwael | Okay Iawn | Good Da | Very Good Da iawn | Excellent Ardderchog |
| ★          | ★         | ★       | ★                 | ★                    |

Any comments?

2. How would the patient describe themselves? Sut yw'r claf yn disgrifio ei hun?

|                             |                      |                      |
|-----------------------------|----------------------|----------------------|
|                             | Age<br>Oid           | Gender<br>Rhyw       |
| Demographics<br>Demograffeg | <input type="text"/> | <input type="text"/> |

3. How many times have you used video for a health or social care consultation, and would you use it again? Sawl gwaith ydych chi wedi defnyddio fideo am ymgynghoriad iechyd neu ofal iechyd, a byddwch chi'n defnyddio eto?

|                                         |                                                                                                |                                                                                    |
|-----------------------------------------|------------------------------------------------------------------------------------------------|------------------------------------------------------------------------------------|
|                                         | How many times have you used a video consultation?<br>Sawl gwaith ydych chi wedi ei defnyddio? | Would you like to use video consultation again?<br>Byddwch chi'n ei defnyddio eto? |
| Video Consultation<br>Use Defnydd fideo | <input type="text"/>                                                                           | <input type="text"/>                                                               |

4. What was your video consultation related to today? Beth oedd eich ymgynghoriad fideo yn ynghylch heddiw?

☐ First time appointment  
Awyntiad gyntaf

☐ Advice & support  
Cymorth neu gyngor

☐ Review of my health and/or results  
Adolygiad iechyd/ canlyniadau

☐ Final appointment & discharge  
Apwyntiad olaf neu ryddhad

☐ Therapy or treatment session  
Therapi neu sesiwn triniaeth

Other (please specify)

5. Do you feel that this video consultation prevented you needing a face-to-face appointment?

Wnaeth yr ymgynghoriad fideo osgoi'r angen i'r claf gael apwyntiad wyneb i wyneb?

☐ Yes Ie

☐ No na

☐ I don't know ansicr

Comments?

6. For your video consultation today, what type of healthcare speciality and professional did you see? Am eich ymgynghoriad fideo heddiw, pa fath o arbenigwr a phroffesiwn gwelwch chi?

Health Condition Speciality  
Arbenigwrwydd cyflwr iechyd

Professional  
Phroffesiwn

| Speciality & Professional<br>Arbenigwr a Phroffesiwn | Health Condition Speciality<br>Arbenigwrwydd cyflwr iechyd | Professional<br>Phroffesiwn |
|------------------------------------------------------|------------------------------------------------------------|-----------------------------|
|                                                      | <input type="text"/>                                       | <input type="text"/>        |

Please state the health-related reason for your video consultation today?

7. How long would it typically take you to travel from your home to your consultation? (one way) Pa mor hir fyddai hi'n cymryd i chi deithio i'ch apwyntiad fel arfer?

Minutes (Traveling one-way)

Miles (if known)

Parking (at the site)

8. Which Health Board Region are you in? ☐ ba Ranbarth Bwrdd Iechyd ydych chi'n dod?

- |                                                                 |                                                           |
|-----------------------------------------------------------------|-----------------------------------------------------------|
| <input type="radio"/> Aneurin Bevan University Health Board     | <input type="radio"/> Hywel Dda University Health Board   |
| <input type="radio"/> Betsi Cadwaladr University Health Board   | <input type="radio"/> Powys Teaching Health Board         |
| <input type="radio"/> Cardiff & Vale University Health Board    | <input type="radio"/> Swansea Bay University Health Board |
| <input type="radio"/> Cwm Taf Morgannwg University Health Board | <input type="radio"/> Velindre Cancer Centre              |

9. TEC Cymru's researchers will be running interviews with clinicians. Please leave your email below if you would like to take part, and we will contact you to arrange a date and time. Address

Email Address

10. Any other comments, questions or concerns?

Unrhyw sylwadau, cwesitynau neu bryderon eraill?

***By submitting this survey I provide full consent for the data provided to be used anonymously in publications and presentations by the TEC Cymru team working in the NHS.***

Tick Box [ ]

Survey 2: (Additional Questions Added)

11. Did you experience any difficulties with your video consultation today? Gwelwch chi unrhyw anawsterau gydag eich ymgynghoriad fideo heddiw?

|                                                                                               | A lot llawer          | Some Rhywfaint        | A little Ychydig      | Not at all Dim        | N/A                   |
|-----------------------------------------------------------------------------------------------|-----------------------|-----------------------|-----------------------|-----------------------|-----------------------|
| <b>Difficulties with a device</b><br>Anawsterau Gyda dyfais                                   | <input type="radio"/> |
| <b>Difficulties with Internet connection</b><br>Anawsterau gyda chysylltiad rhyngwrwyd        | <input type="radio"/> |
| <b>Difficulties with video/picture</b><br>Anawsterau gyda llun/ fideo                         | <input type="radio"/> |
| <b>Difficulties with audio/sound</b><br>Anawsterau gyda sain                                  | <input type="radio"/> |
| <b>Difficulties with privacy or a safe space</b><br>Anawsteru gyda diogelwch neu pbeifatrwydd | <input type="radio"/> |
| <b>Lack of confidence using video calls</b><br>Diffyg hyder gyda defnydd fideo                | <input type="radio"/> |
| <b>Not suitable for clinical needs</b><br>Anaddas am anghenion clinigol                       | <input type="radio"/> |
| <b>Prefer face to face or telephone</b><br>Mae'n well gen i wyneb yn wyneb neu dros y ffôn    | <input type="radio"/> |

## 12. How did your video consultation benefit you today? Sut aeth yr ymgynghoriad fideo buddio chi heddiw?

|                                                                                                      | Very beneficial<br>Buddiol iawn | Beneficial<br>Buddiol | Quite beneficial<br>Eithaf Buddiol | Not beneficial<br>Dim yn Buddies | Not at all<br>beneficial<br>Dim yn Buddiol o gwbl | N/A                   |
|------------------------------------------------------------------------------------------------------|---------------------------------|-----------------------|------------------------------------|----------------------------------|---------------------------------------------------|-----------------------|
| Saved time & preparation<br>Arbed Amser a Pharatoi                                                   | <input type="radio"/>           | <input type="radio"/> | <input type="radio"/>              | <input type="radio"/>            | <input type="radio"/>                             | <input type="radio"/> |
| Saved travel & parking<br>Arbed teithio                                                              | <input type="radio"/>           | <input type="radio"/> | <input type="radio"/>              | <input type="radio"/>            | <input type="radio"/>                             | <input type="radio"/> |
| Saved the environment & co2 emissions<br>Arbed yr amgylchedd ac allbwn co2                           | <input type="radio"/>           | <input type="radio"/> | <input type="radio"/>              | <input type="radio"/>            | <input type="radio"/>                             | <input type="radio"/> |
| Saved taking time off school, work or other commitments<br>Arbed amser o waith, ysgol neu ymrwymadau | <input type="radio"/>           | <input type="radio"/> | <input type="radio"/>              | <input type="radio"/>            | <input type="radio"/>                             | <input type="radio"/> |
| Saved money e.g., childcare, travel<br>Arbed arian am ofal plant/ teithio                            | <input type="radio"/>           | <input type="radio"/> | <input type="radio"/>              | <input type="radio"/>            | <input type="radio"/>                             | <input type="radio"/> |
| Improved access to care & waiting times<br>Gwella mynediad i ofal ac amser aros                      | <input type="radio"/>           | <input type="radio"/> | <input type="radio"/>              | <input type="radio"/>            | <input type="radio"/>                             | <input type="radio"/> |
| Improved convenience e.g., staying at home<br>Gwella hwylustod e.e. aros adref                       | <input type="radio"/>           | <input type="radio"/> | <input type="radio"/>              | <input type="radio"/>            | <input type="radio"/>                             | <input type="radio"/> |
| Improved family involvement & support<br>Gwella cyfranogiad a chymorth teulu                         | <input type="radio"/>           | <input type="radio"/> | <input type="radio"/>              | <input type="radio"/>            | <input type="radio"/>                             | <input type="radio"/> |
| Lowered rates of infection risk<br>Lleihau cyfraddau haint                                           | <input type="radio"/>           | <input type="radio"/> | <input type="radio"/>              | <input type="radio"/>            | <input type="radio"/>                             | <input type="radio"/> |
| Lowered stress and anxiety<br>Lleihau straen a phryder                                               | <input type="radio"/>           | <input type="radio"/> | <input type="radio"/>              | <input type="radio"/>            | <input type="radio"/>                             | <input type="radio"/> |

**By submitting this survey I provide full consent for the data provided to be used anonymously in publications and presentations by the TEC Cymru team working in the NHS.**

Tick Box [ ]
