# Supplementary figures and images for: Digital NHS Wales: a coding reliability analysis based on the voices of 22 978 patients and clinicians on the benefits, challenges and sustainability of video consulting
Source: HighWire-hosted journal article supplement (doi:10.1136/bmjopen-2021-057874), 2022-04-01

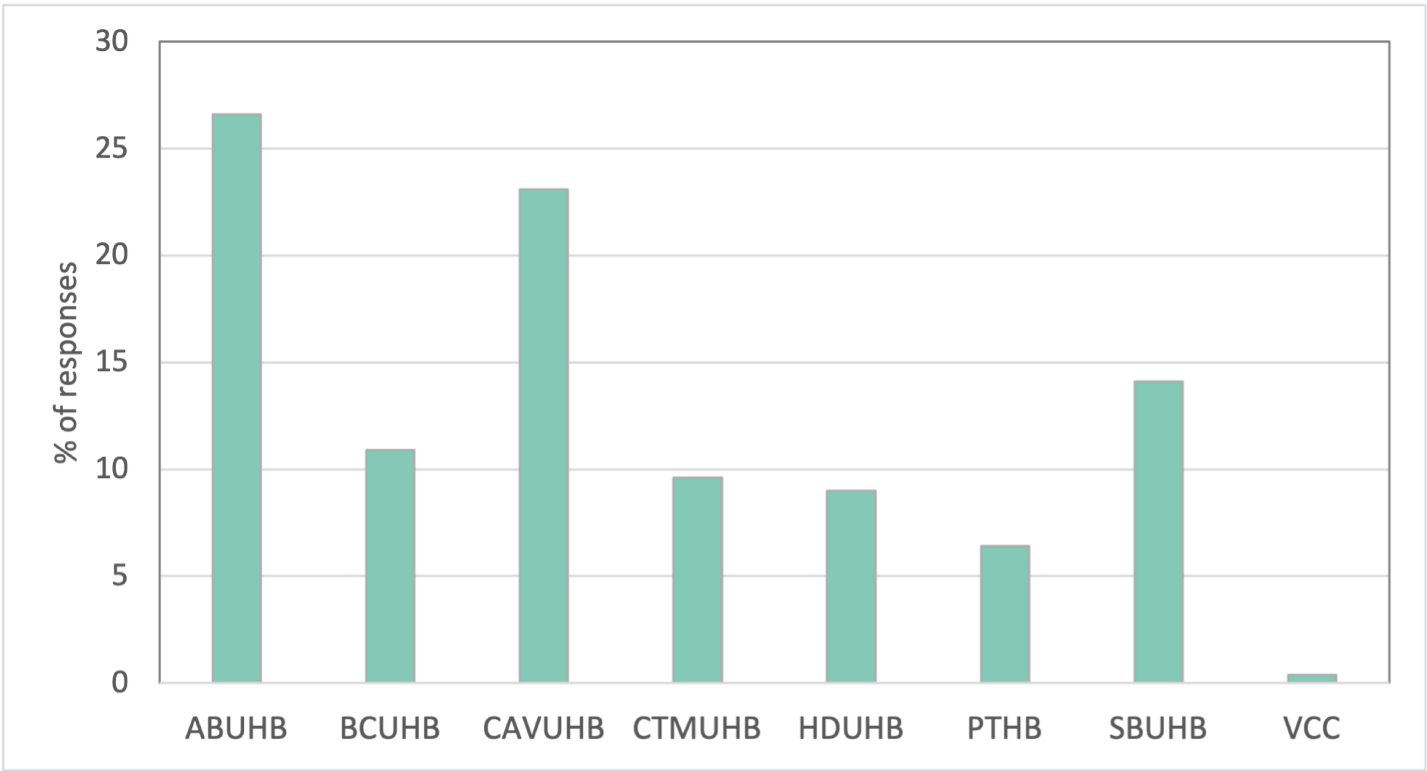

Supplement: bmjopen-2021-057874supp002_data_supplement.pdf [file bmjopen-2021-057874supp002_data_supplement.pdf]

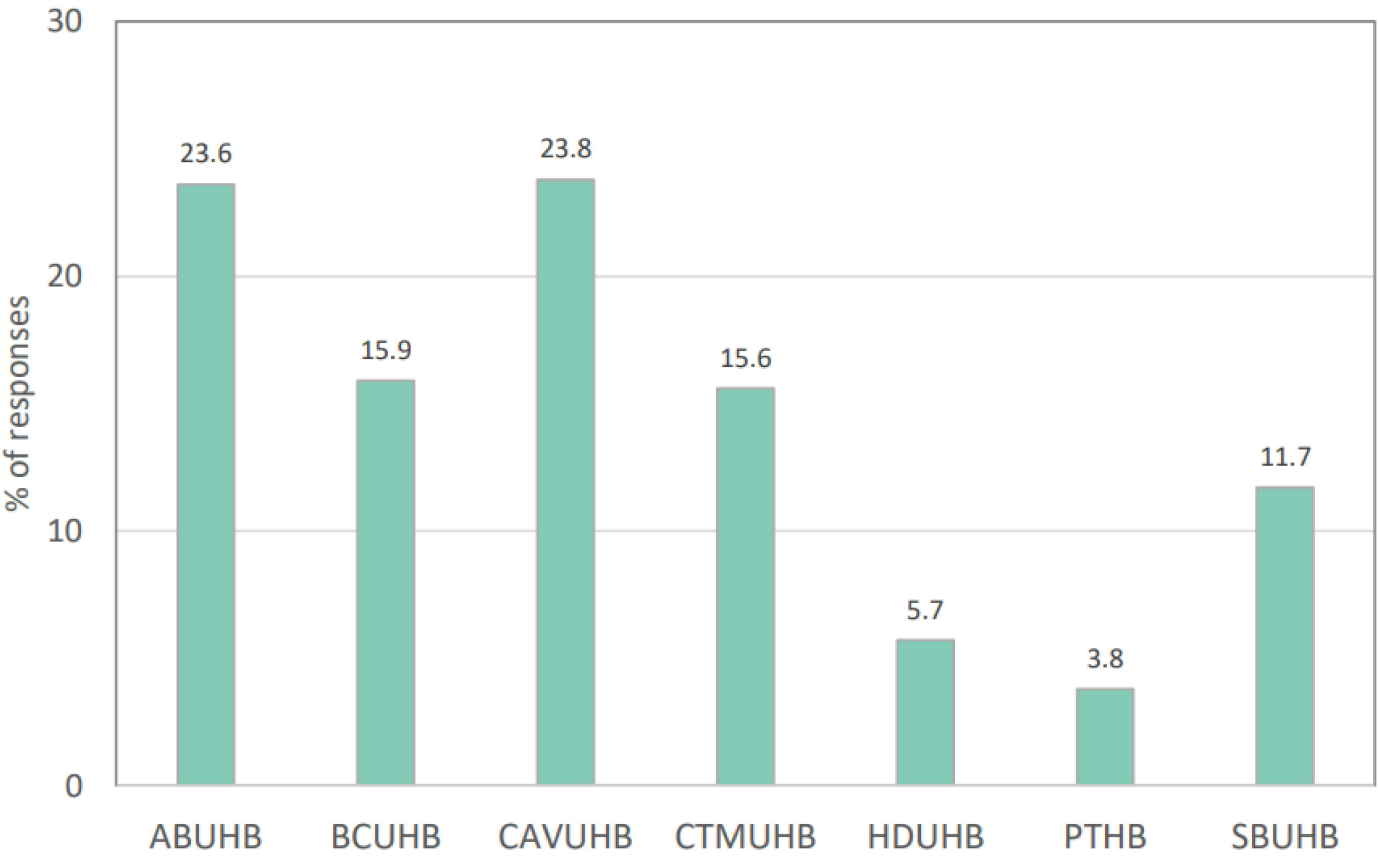

Supplement: bmjopen-2021-057874supp003_data_supplement.pdf [file bmjopen-2021-057874supp003_data_supplement.pdf]

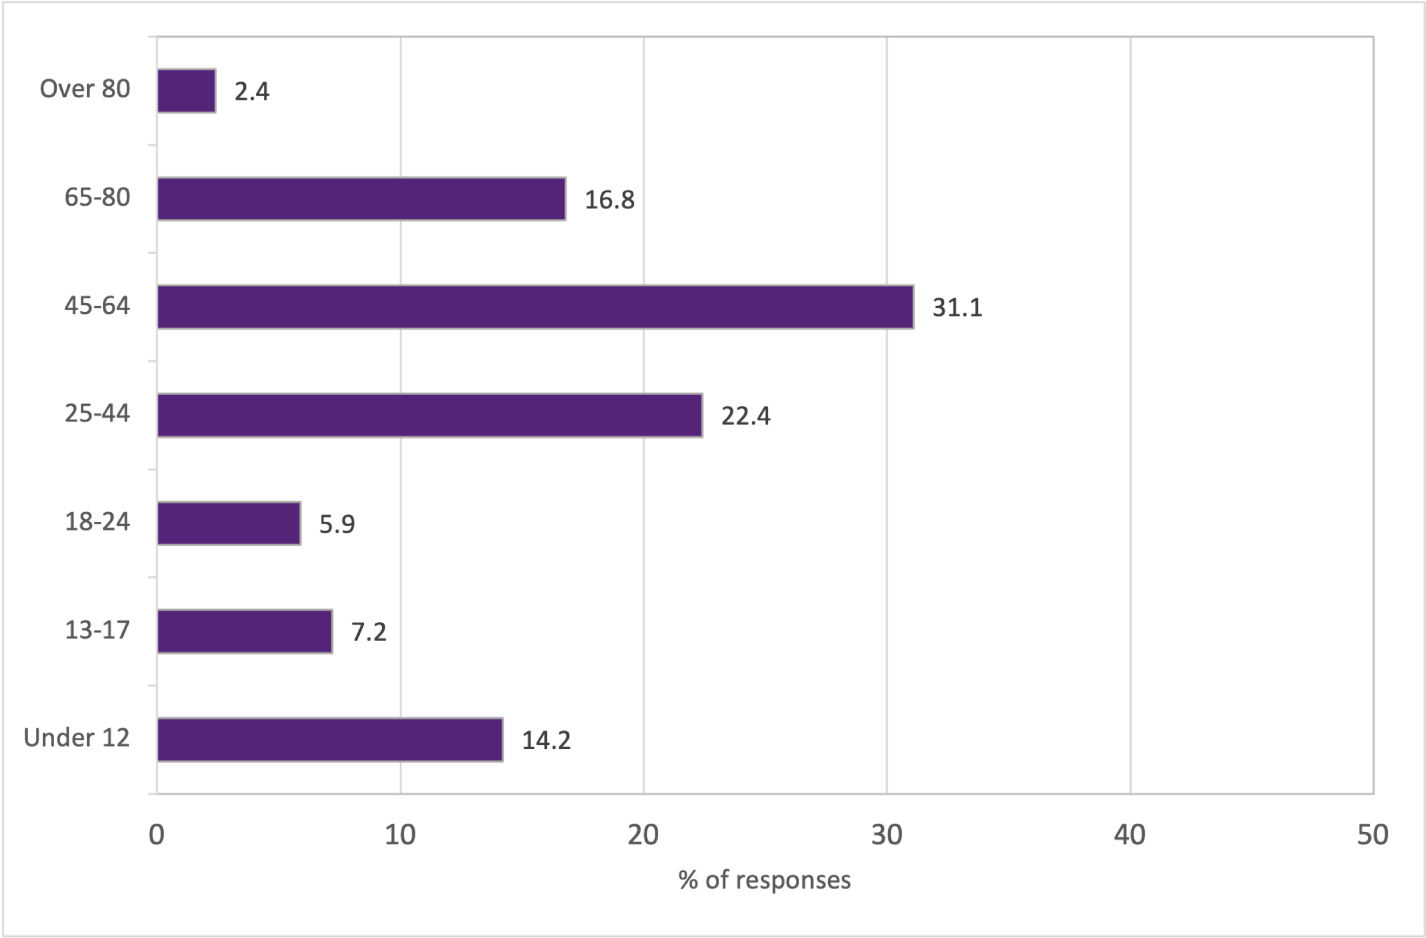

Supplement: bmjopen-2021-057874supp007_data_supplement.pdf [file bmjopen-2021-057874supp007_data_supplement.pdf]

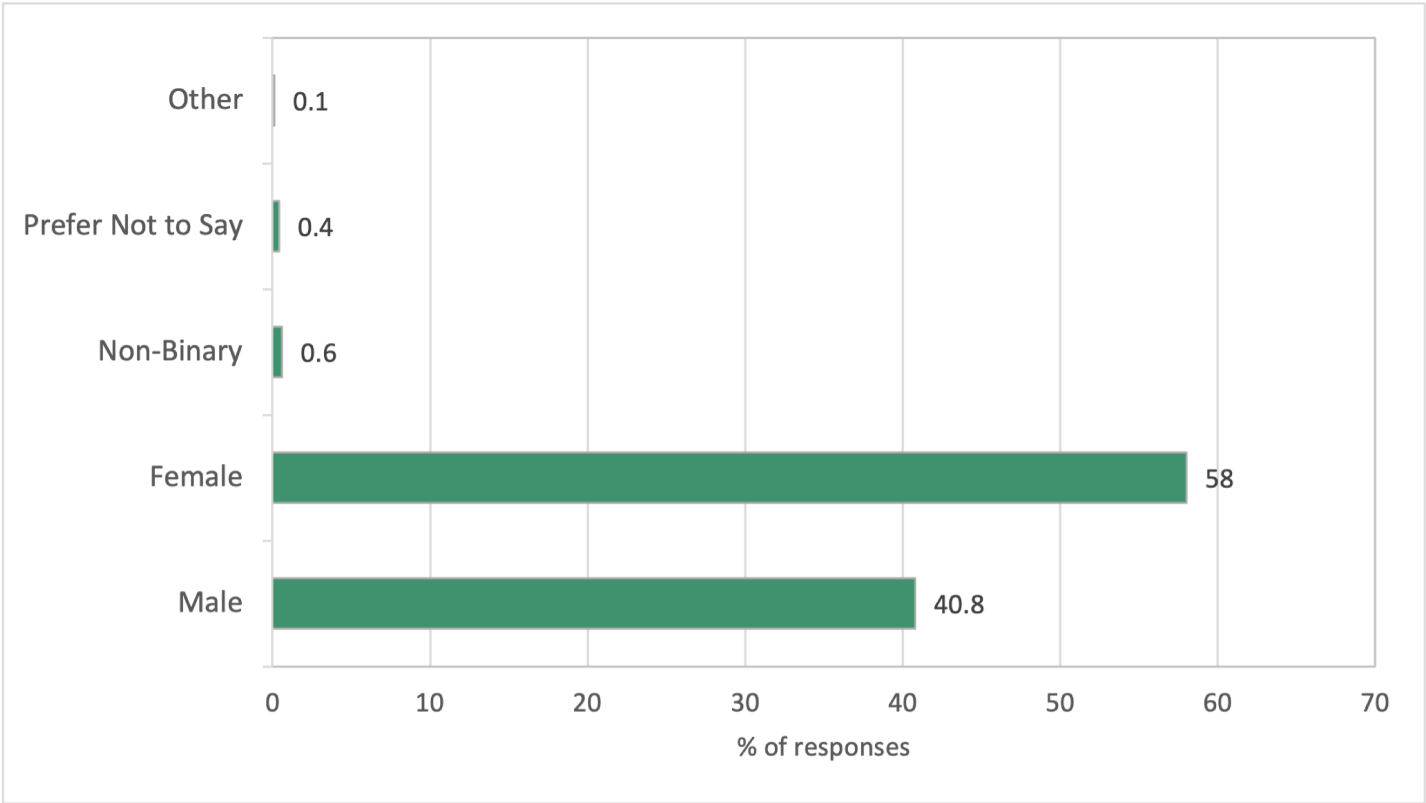

Supplement: bmjopen-2021-057874supp008_data_supplement.pdf [file bmjopen-2021-057874supp008_data_supplement.pdf]

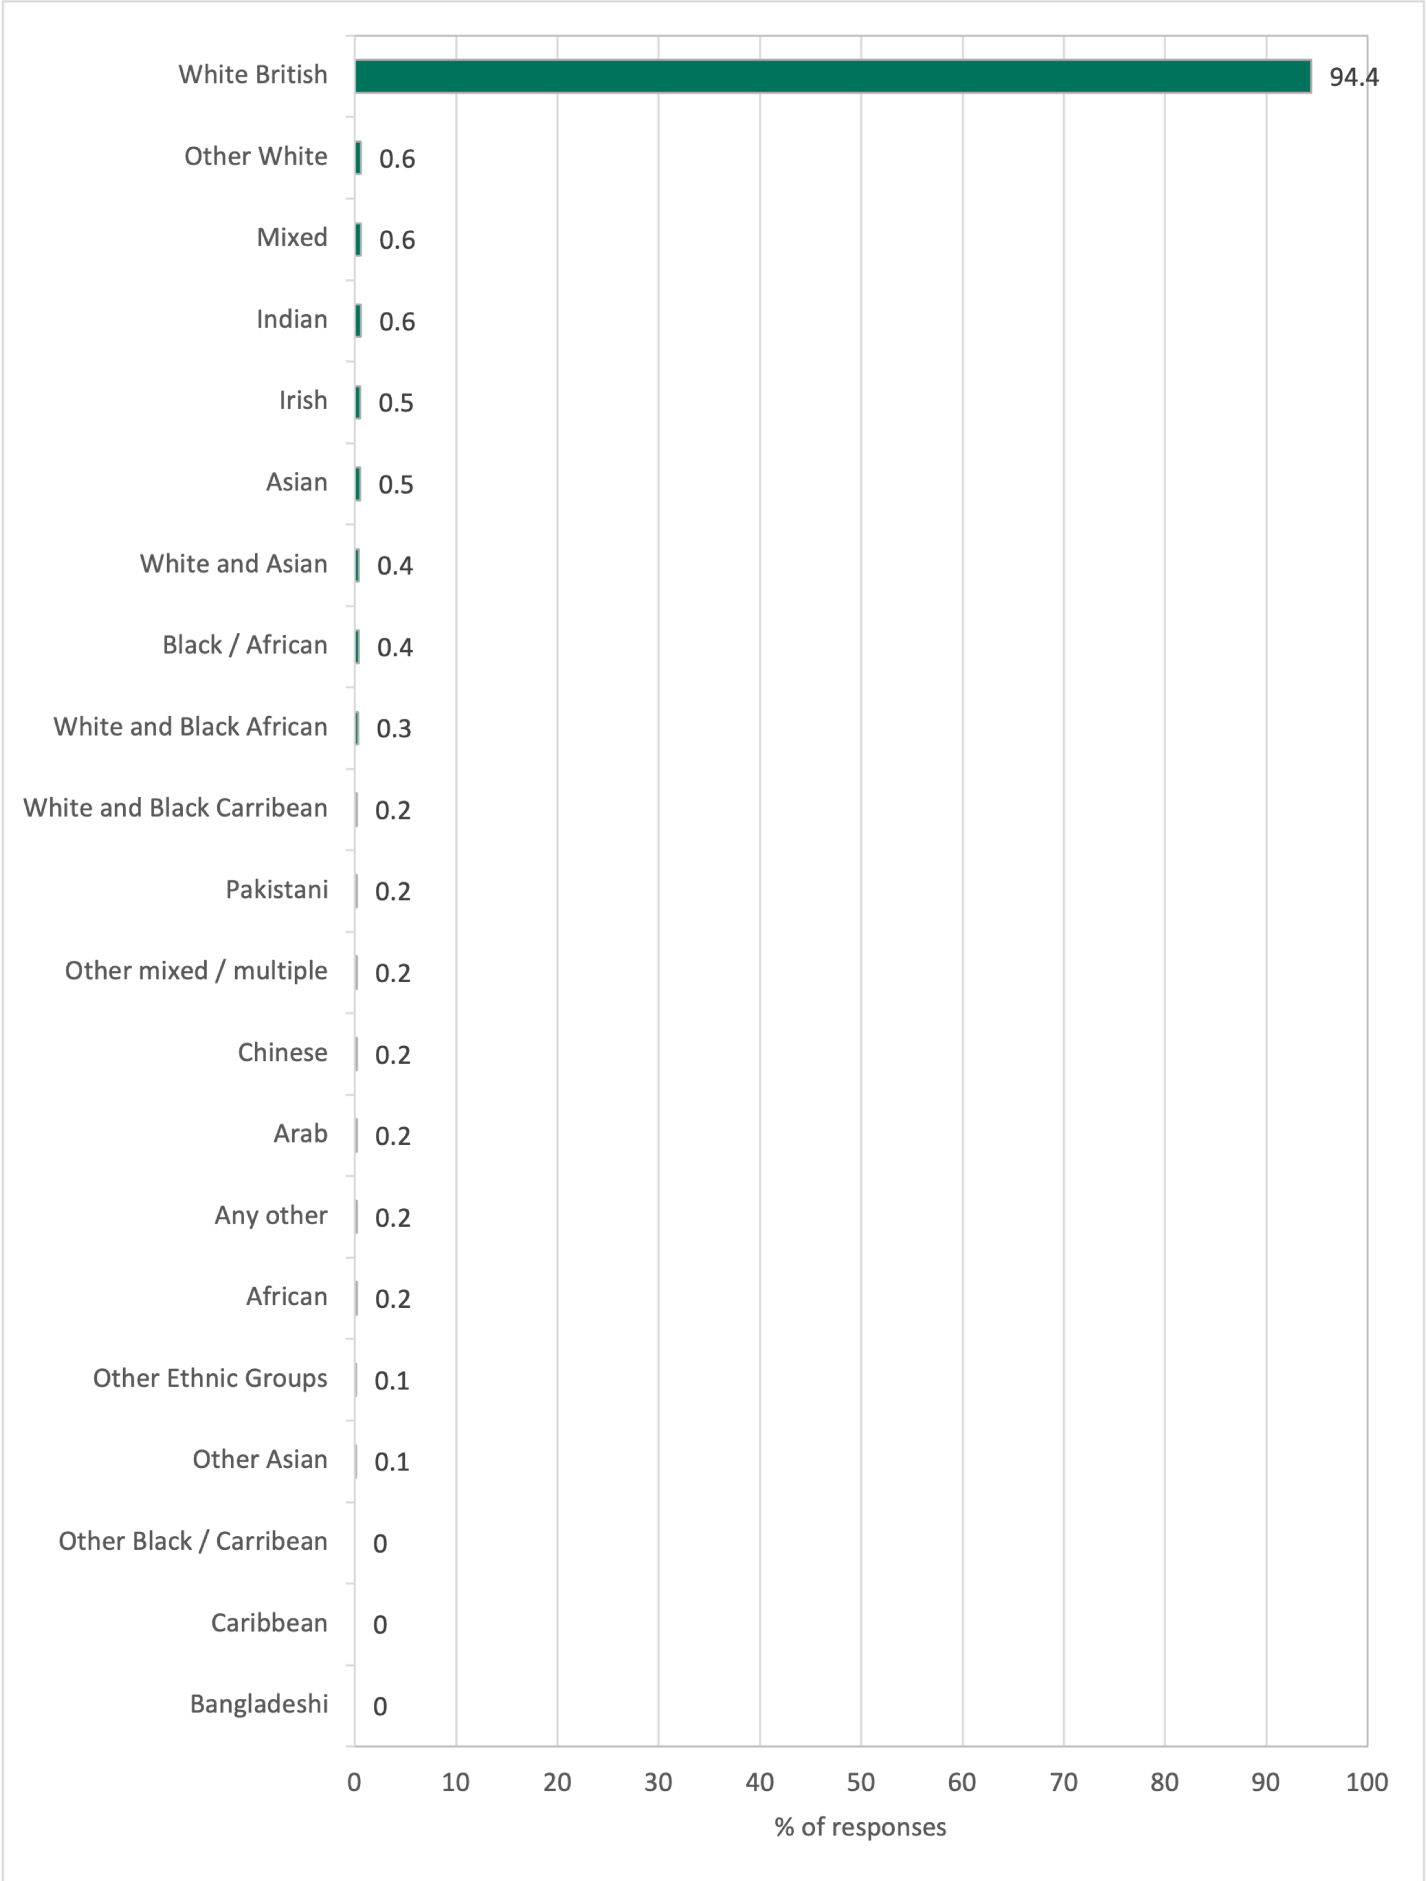

Supplement: bmjopen-2021-057874supp009_data_supplement.pdf [file bmjopen-2021-057874supp009_data_supplement.pdf]

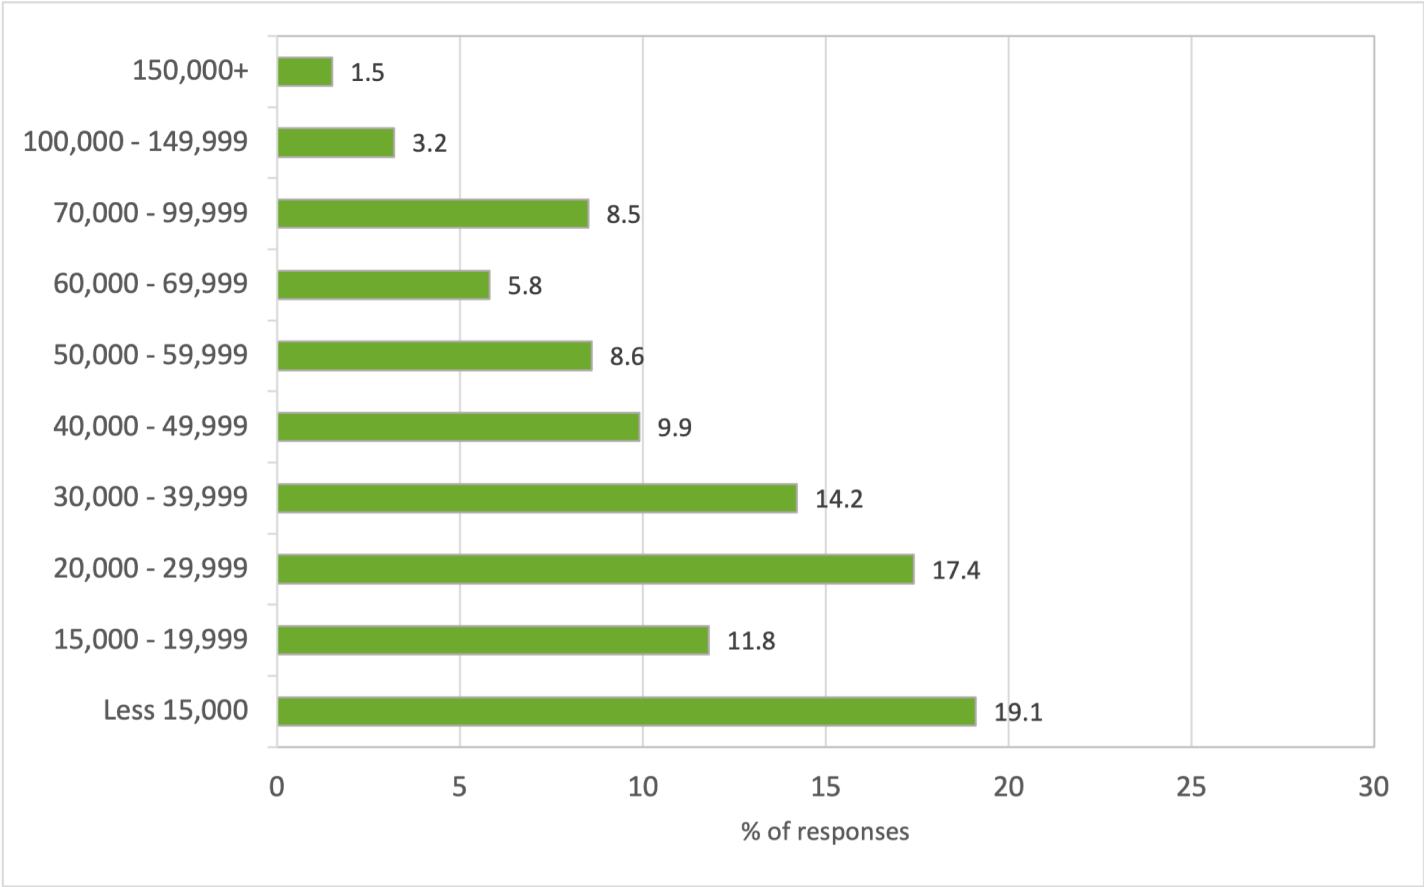

Supplement: bmjopen-2021-057874supp010_data_supplement.pdf [file bmjopen-2021-057874supp010_data_supplement.pdf]
